# Supplementary material
Source: PubMed Central journal article supplement (PMC3974830)
Supplement: cbt-15-289-s01.pdf [file cbt-15-289-s01.pdf]

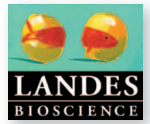

## **Supplemental Material to:**

**Salma Buddaseth, Wiebke Göttmann, Rainer Blasczyk,  
and Trevor Huyton**

**Overexpression of the pp32r1 (ANP32C) oncogene or  
its functional mutant pp32r1Y140H confers enhanced  
resistance to FTY720 (Fingolimod)**

**Cancer Biology & Therapy 2014; 15(3)  
<http://dx.doi.org/10.4161/cbt.27307>**

**<http://www.landesbioscience.com/journals/cbt/article/27307/>**

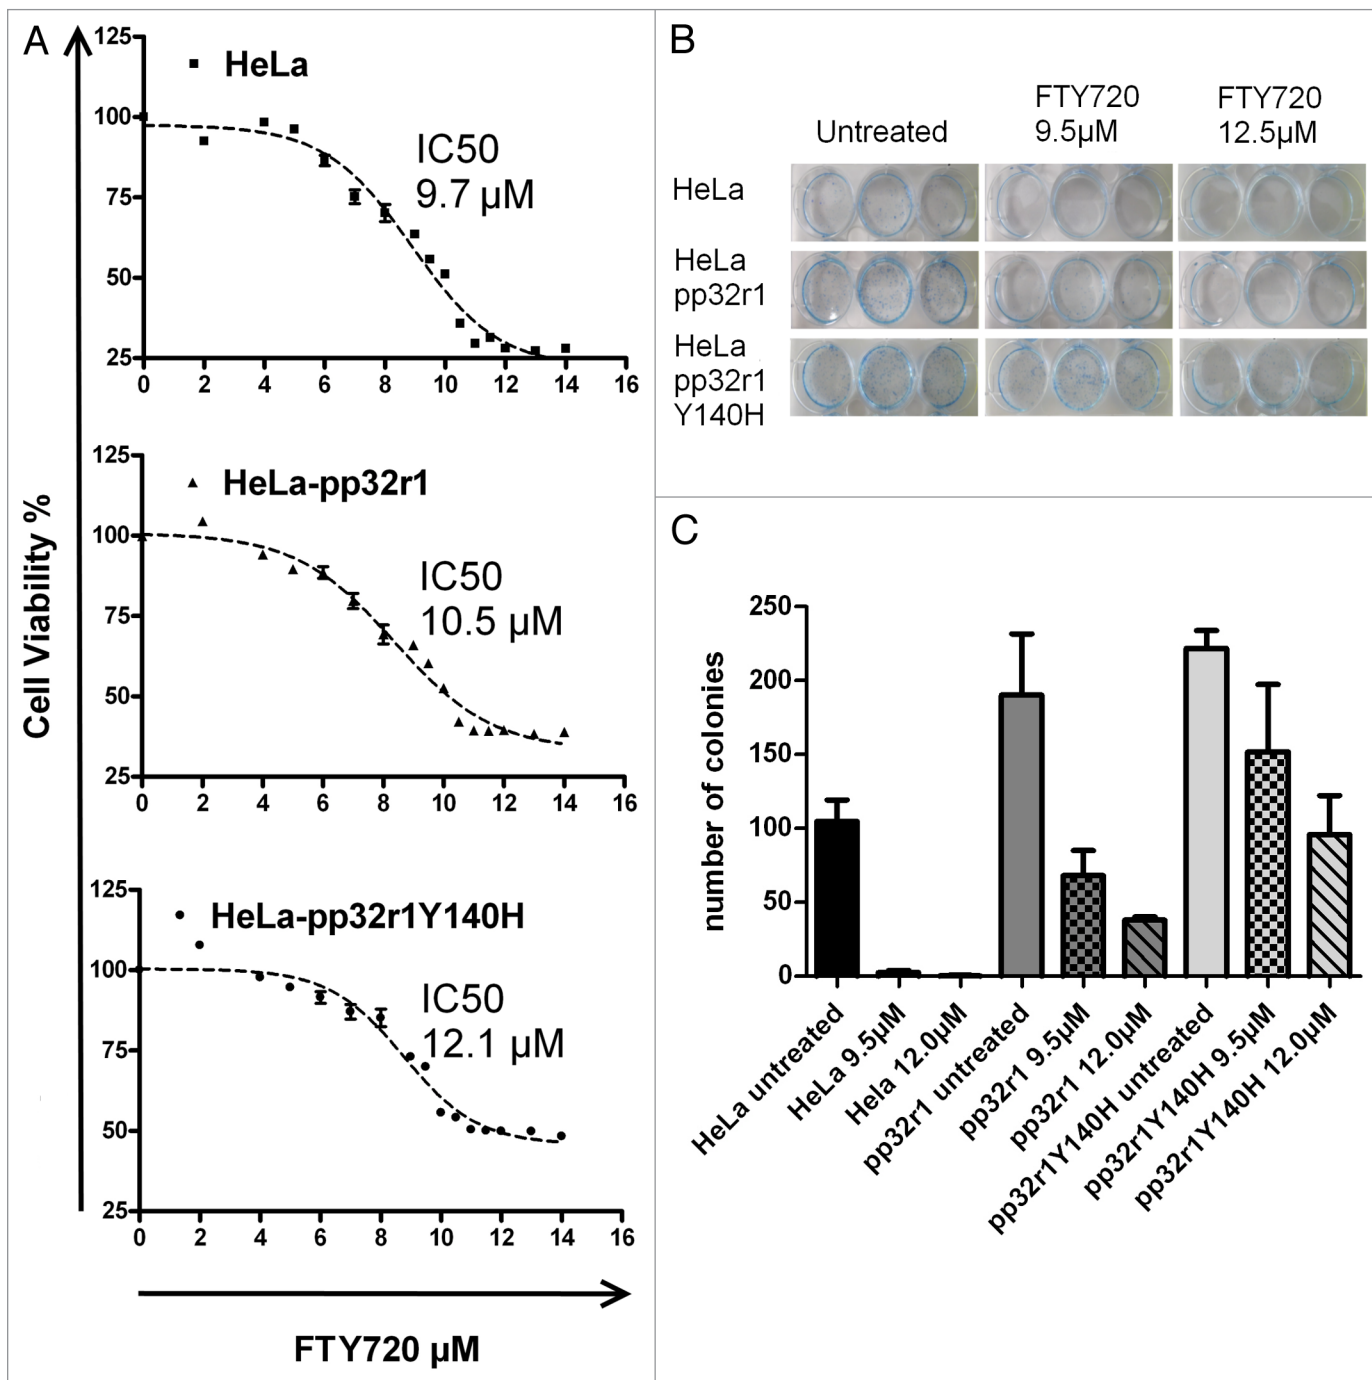

**Figure S1.** Increased viability of pp32r1 and pp32r1Y140H transduced HeLa cell lines treated with FTY720. (A) MTT assay carried out on HeLa, HeLa-pp32r1, and HeLa-pp32r1Y140H cell lines treated with 2–16  $\mu\text{M}$  FTY720 and compared to untreated cells. (B) Colony formation assay of untransduced and transduced cell lines treated with 9.5  $\mu\text{M}$  and 12.5  $\mu\text{M}$  FTY720. (C) A graphical representation of the data shown in (B).
